# Supplementary material
Source: PubMed Central journal article supplement (PMC2781566)
Supplement: supp_M109.047753_jbc.M109.047753-1.pdf [file supp_M109.047753_jbc.M109.047753-1.pdf]

**Supplementary Table 1: List of real-time PCR primer sequences**

|                     |                            |
|---------------------|----------------------------|
| mGSTA4-RT5          | CTGTA CTGTCCGACTTCCCTC     |
| mGSTA4-RT3          | CTCTGACTTCCGGGTGCAG        |
| mCAT-RT5            | GTCCAGTGCCTGTAGATGTG       |
| mCAT-RT3            | CCTCCTCATTCAACACCTTTGTG    |
| mGPX3-RT5           | GACATCCGCTGGAACCTTGAG      |
| mGPX3-RT3           | CAGGATGTCCATCTTGACGTTG     |
| mGPX1-RT5           | CTCACCCGCTCTTTACCTC        |
| mGPX1-RT3           | CACACCGGAGACCAAATGATG      |
| mGSTP1-RT5          | TGTCACCCTCATCTACACCAAC     |
| mGSTP1-RT3          | CAGGGTCTCAAAGGCTTCAG       |
| mMT1-RT5            | CAAGA ACTGCAAGTGCACCTC     |
| mMT1-RT3            | CGCCTTTGCAGACACAGC         |
| mMT2-RT5            | CGCCTGCAAATGCAAACAATG      |
| mMT2-RT3            | GAAGCCTCTTTGCAGATGCAG      |
| mGSTA2-RT5          | CCCAATGTGAAGAAGTTCCTACAT   |
| mGSTA2-RT3          | ACACTAAA ACTTGAAAACCTTCC   |
| mGSTM1-RT5          | GAGGGCCTCAAGAAGATCTCTG     |
| mGSTM1-RT3          | TTACTCCAGTGGGCCATCTTTG     |
| mIL-1 $\beta$ -RT5  | TTGAGGGACCCAAAAGATG        |
| mIL-1 $\beta$ -RT3  | TGGACAGCCCAGGTCAAAG        |
| mTNF- $\alpha$ -RT5 | CATCTTCTCAA AATTCGAGTGACAA |
| mTNF- $\alpha$ -RT3 | TGGGAGTAGACAAGGTACAACCC    |
| mLXR $\alpha$ -RT5  | AGGAGTGTGACTTCGCAA         |
| mLXR $\alpha$ -RT3  | CTCTTCTTGCCGCTTCAGTTT      |
| mLXR $\beta$ -RT5   | AAGCAGGTGCCAGGGTTCT        |
| mLXR $\beta$ -RT3   | TGCATTCTGTCTCGTGGTTGT      |
| hIL-6-RT5           | AAGAGGCACTGGCAGAAAA        |
| hIL-6 RT3           | TTCACCAGGCAAGTCTCCT        |
| hIL-8-RT5           | GTGCAGTTTTGCCAAGGAGT       |
| hIL-8-RT3           | AAATTTGGGGTGGAAAGGTT       |
| hMCP-1-RT5          | AAGCAGAAGTGGGTT CAGGA      |
| hMCP-1 RT3          | GCTGCAGATTCTGGGTTGT        |

**Supplementary Table 2.** Partial list of antioxidant genes whose expression was increased in the lung of LXR-KI mice.

| Gene names                                            | Accession No. | Fold change<br>(LXR-KI:WT) |
|-------------------------------------------------------|---------------|----------------------------|
| Catalase (CAT)                                        | NM_009804.1   | 2.0                        |
| Glutathione <i>S</i> -transferase, mu 1<br>(Gstm1)    | NM_010358.1   | 2.0                        |
| Glutathione <i>S</i> -transferase, mu 2<br>(Gstm2)    | NM_008183.1   | 2.1                        |
| Glutathione <i>S</i> -transferase, alpha 4<br>(Gsta4) | NM_010357.1   | 2.3                        |
| Glutathione <i>S</i> -transferase, pi 1 (Gstp1)       | NM_013541.1   | 2.3                        |
| Metallothionein 1 (Mt1)                               | NM_013602.1   | 2.5                        |
| Metallothionein 2 (Mt2)                               | AA796766      | 3.2                        |
| Glutathione peroxidase 3 (Gpx3)                       | NM_008161.1   | 1.9                        |
| Glutathione peroxidase 1 (Gpx1)                       | BI219063      | 1.6                        |
